# Supplementary material
Source: ML conference proceedings conference paper supplement (https://openaccess.thecvf.com/content/WACV2024/html/Wang_RS2G_Data-Driven_Scene-Graph_WACV_2024_paper.html)
Supplement: Supplementary file 2 [file Wang_RS2G_Data-Driven_Scene-Graph_WACV_2024_supplemental.zip]

Archive with 2 entries (2 files):
- 1924_supp/RS2G_code.zip
- 1924_supp/Supplementary.pdf
